# Supplementary material for: Structures of three MORN repeat proteins and a re-evaluation of the proposed lipid-binding properties of MORN repeats
Source: PubMed Central journal article supplement (PMC7725318; doi:10.1371/journal.pone.0242677), 2020-12-09
Supplement: pone.0242677.s018.pdf [file pone.0242677.s018.pdf]

### Raw data for Fig 3C, Fig 3G

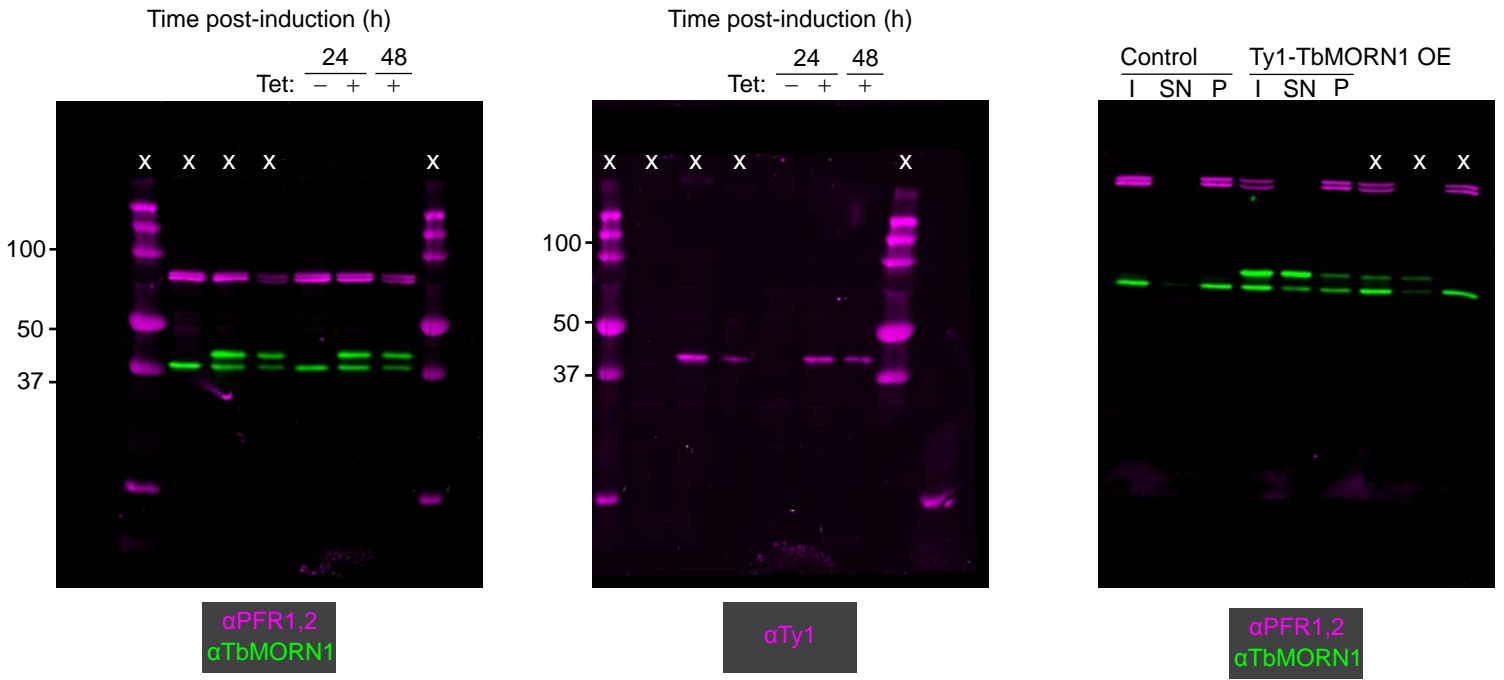

Images obtained using Odyssey CLx (Li-Cor)

### Raw data for Fig 4B

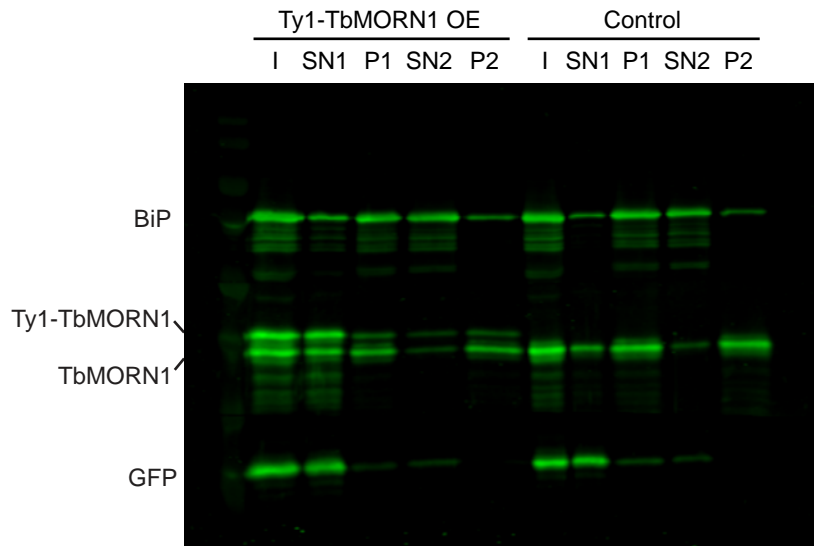

Images obtained using Odyssey CLx (Li-Cor)

Raw data for Fig S1A

**proteinase K : TbMORN1**

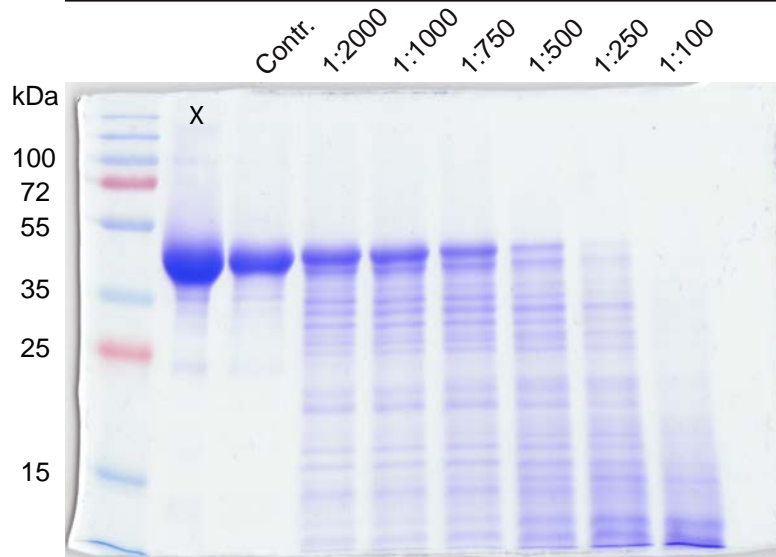

**trypsin : TbMORN1**

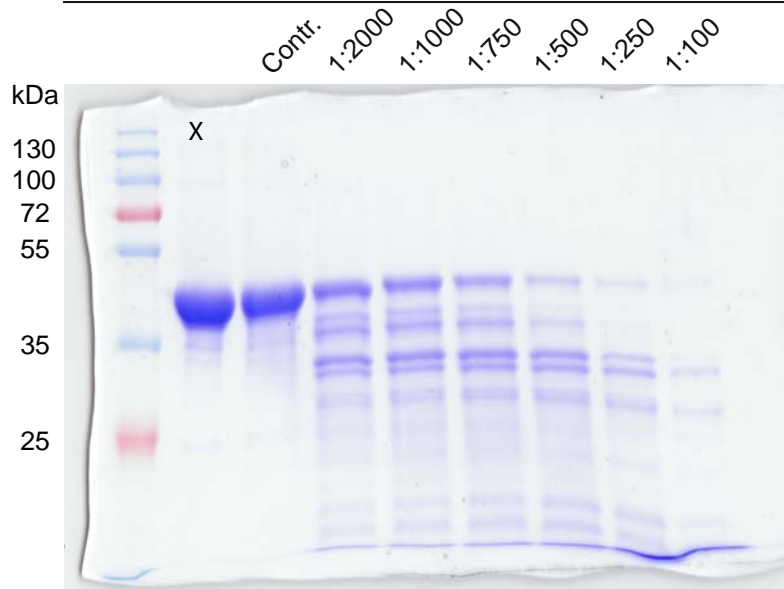

**chymotrypsin : TbMORN1**

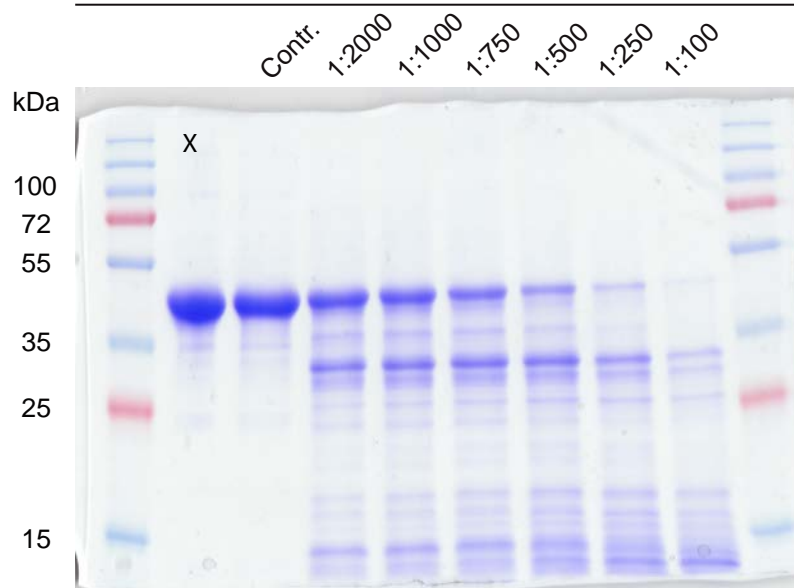

Images obtained using a digital camera

# Raw data for Fig S1C

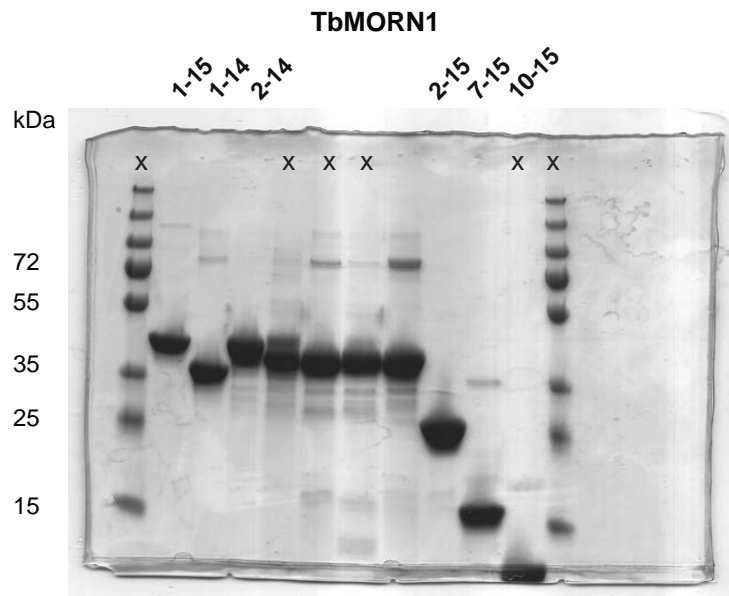

Images obtained using a digital camera



# Raw data for Fig S2D

## TbMORN1(2-15)

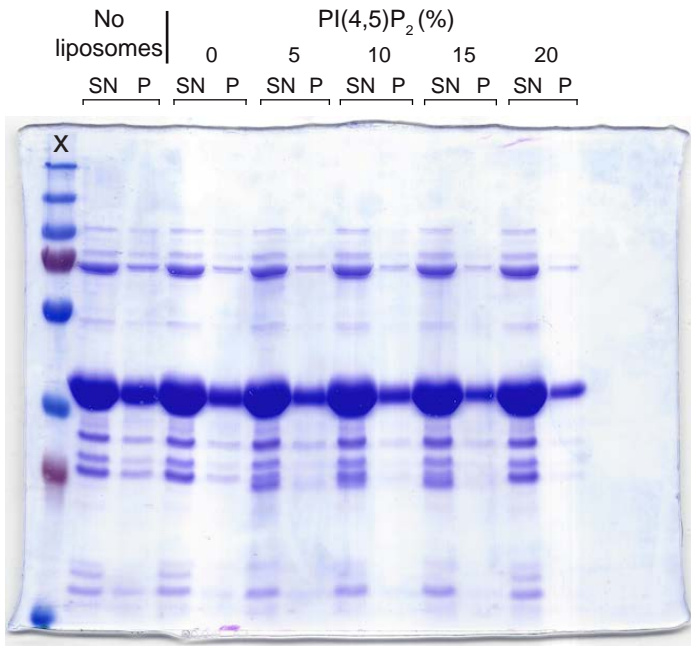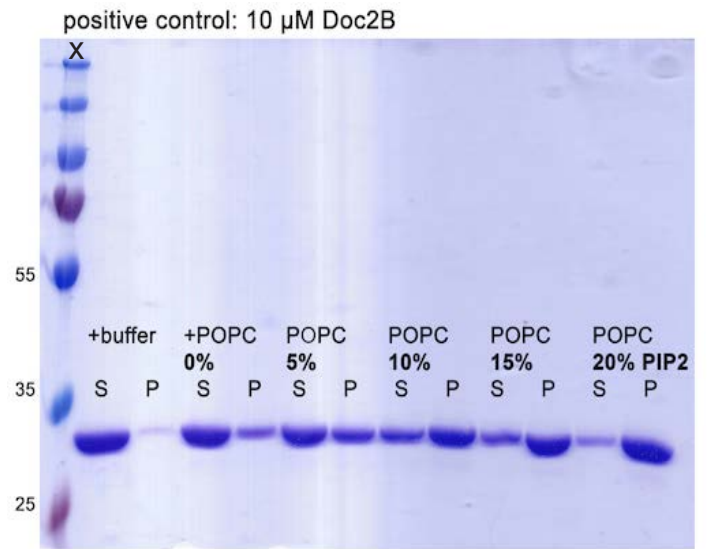

Images obtained using a digital camera

Raw data for Fig S3

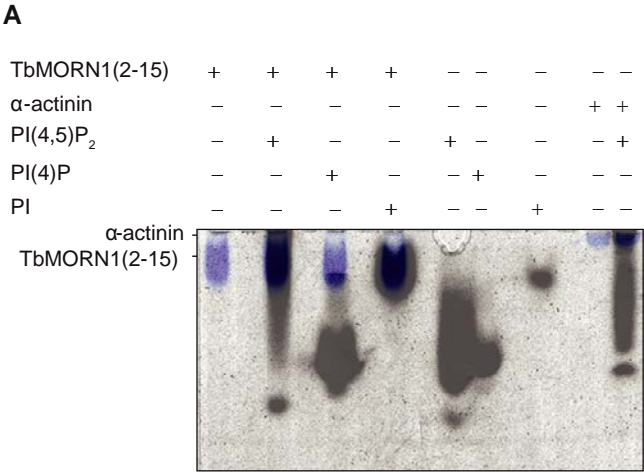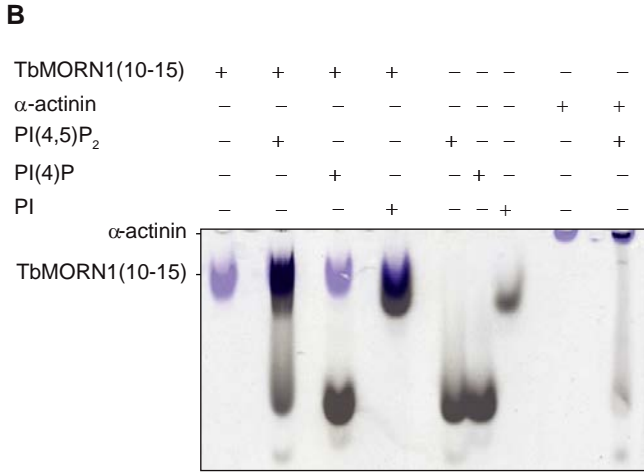

Images obtained using a digital camera

# Raw data for Fig S4A

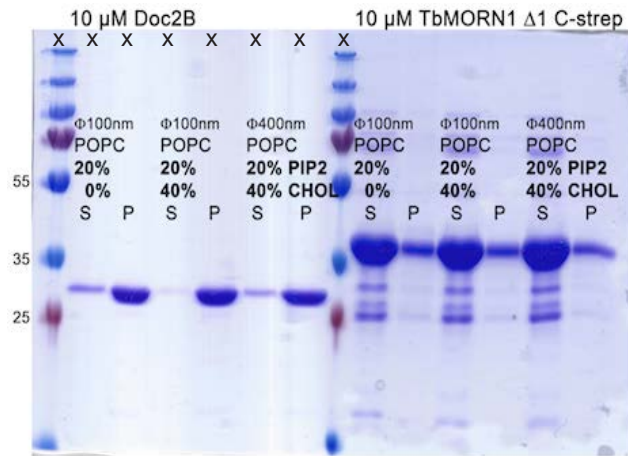

Images obtained using a digital camera

### Raw data for Fig 6ABC

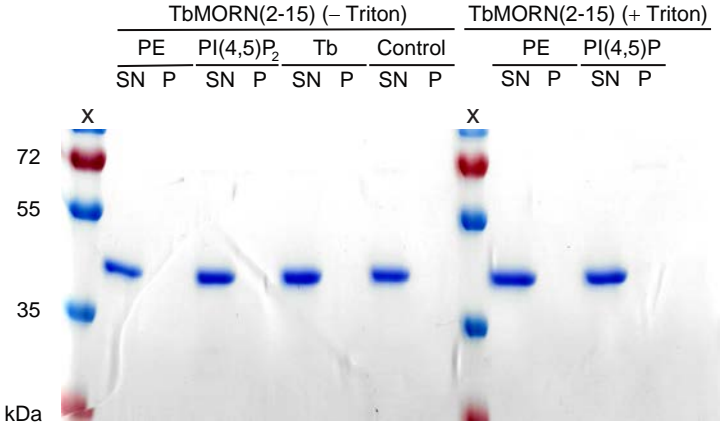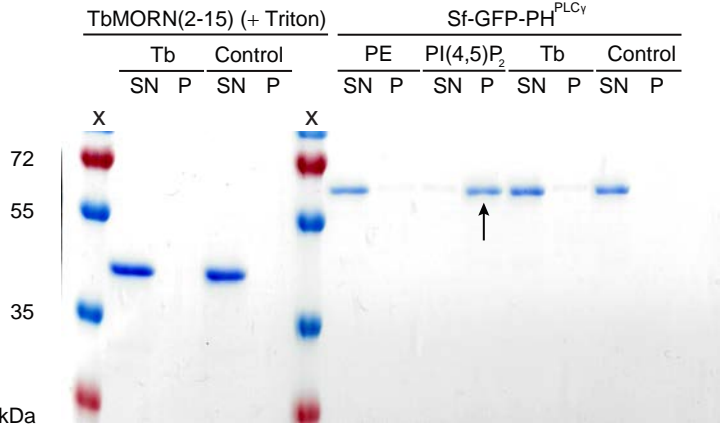

Images obtained using a digital camera

### Raw data for Fig S7A

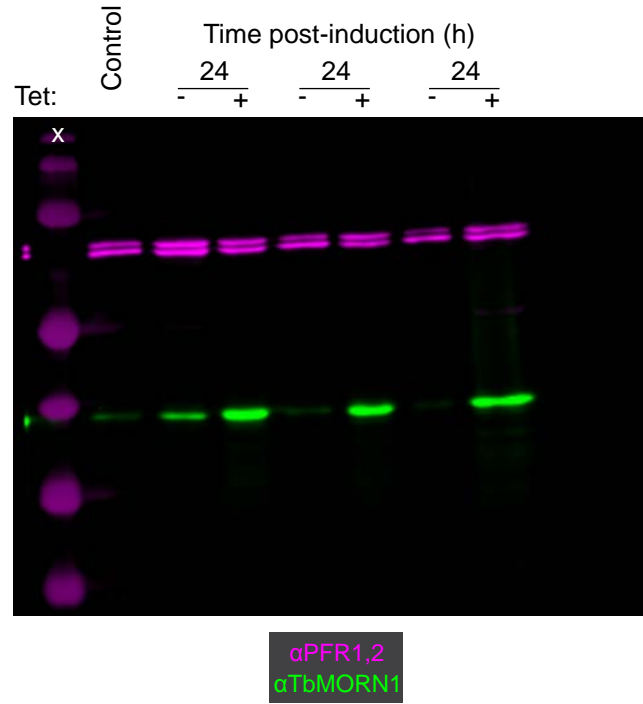

Images obtained using Odyssey CLx (Li-Cor)

### Raw data for Fig S8B

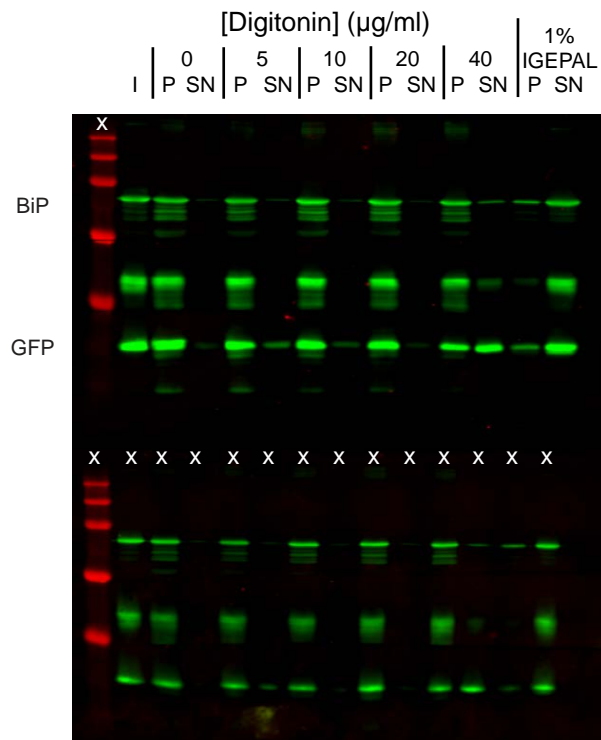

Images obtained using Odyssey CLx (Li-Cor)

# Raw data for Fig S8E

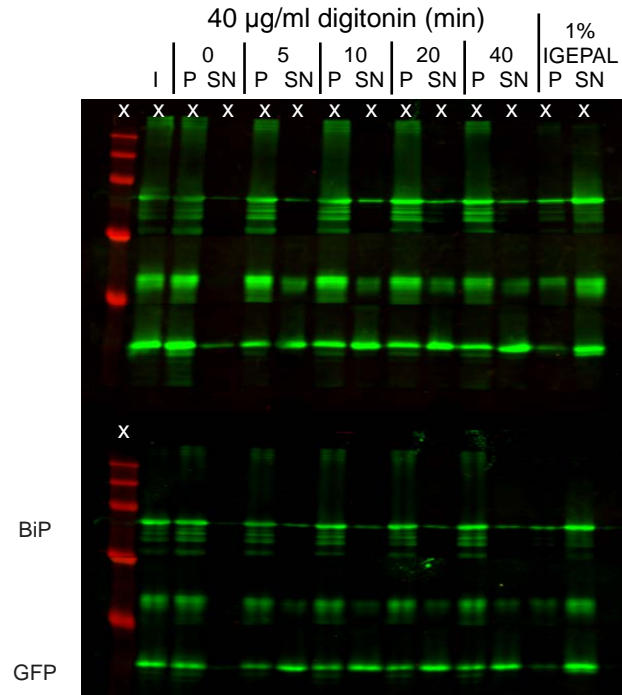

Images obtained using Odyssey CLx (Li-Cor)
