# Supplementary material for: Structures of three MORN repeat proteins and a re-evaluation of the proposed lipid-binding properties of MORN repeats
Source: PubMed Central journal article supplement (PMC7725318; doi:10.1371/journal.pone.0242677), 2020-12-09
Supplement: pone.0242677.s020.pdf [file pone.0242677.s020.pdf]

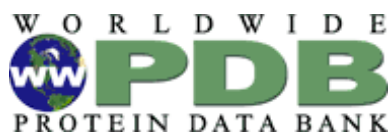

# Full wwPDB X-ray Structure Validation Report ⓘ

Oct 15, 2019 – 08:30 am BST

PDB ID : 6T4R  
Title : Crystal structure of Trypanosoma brucei Morn1  
Deposited on : 2019-10-14  
Resolution : 2.35 Å(reported)

This is a Full wwPDB X-ray Structure Validation Report.

This report is produced by the wwPDB biocuration pipeline after annotation of the structure.

We welcome your comments at [validation@mail.wwpdb.org](mailto:validation@mail.wwpdb.org)

A user guide is available at

<https://www.wwpdb.org/validation/2017/XrayValidationReportHelp>

with specific help available everywhere you see the ⓘ symbol.

---

The following versions of software and data (see [references ⓘ](#)) were used in the production of this report:

MolProbity : 4.02b-467  
Xtriage (Phenix) : 1.13  
EDS : 2.5  
Percentile statistics : 20171227.v01 (using entries in the PDB archive December 27th 2017)  
Refmac : 5.8.0158  
CCP4 : 7.0 (Gargrove)  
Ideal geometry (proteins) : Engh & Huber (2001)  
Ideal geometry (DNA, RNA) : Parkinson et al. (1996)  
Validation Pipeline (wwPDB-VP) : 2.5



## 2 Entry composition [i](#)

There are 2 unique types of molecules in this entry. The entry contains 6556 atoms, of which 3078 are hydrogens and 0 are deuteriums.

In the tables below, the ZeroOcc column contains the number of atoms modelled with zero occupancy, the AltConf column contains the number of residues with at least one atom in alternate conformation and the Trace column contains the number of residues modelled with at most 2 atoms.

- Molecule 1 is a protein called MORN repeat-containing protein 1.

| Mol | Chain | Residues | Atoms         |           |           |          |          | ZeroOcc | AltConf | Trace |   |
|-----|-------|----------|---------------|-----------|-----------|----------|----------|---------|---------|-------|---|
|     |       |          | Total         | C         | H         | N        | O        |         |         |       | S |
| 1   | AAA   | 212      | Total<br>3256 | C<br>1079 | H<br>1547 | N<br>296 | O<br>329 | S<br>5  | 74      | 0     | 0 |
| 1   | CCC   | 210      | Total<br>3226 | C<br>1070 | H<br>1531 | N<br>294 | O<br>326 | S<br>5  | 73      | 0     | 0 |

- Molecule 2 is water.

| Mol | Chain | Residues | Atoms       | ZeroOcc | AltConf |
|-----|-------|----------|-------------|---------|---------|
| 2   | AAA   | 25       | Total<br>25 | O<br>25 | 0       |
| 2   | CCC   | 49       | Total<br>49 | O<br>49 | 0       |

### 3 Residue-property plots [i](#)

These plots are drawn for all protein, RNA and DNA chains in the entry. The first graphic for a chain summarises the proportions of the various outlier classes displayed in the second graphic. The second graphic shows the sequence view annotated by issues in geometry and electron density. Residues are color-coded according to the number of geometric quality criteria for which they contain at least one outlier: green = 0, yellow = 1, orange = 2 and red = 3 or more. A red dot above a residue indicates a poor fit to the electron density ( $RSRZ > 2$ ). Stretches of 2 or more consecutive residues without any outlier are shown as a green connector. Residues present in the sample, but not in the model, are shown in grey.

- Molecule 1: MORN repeat-containing protein 1

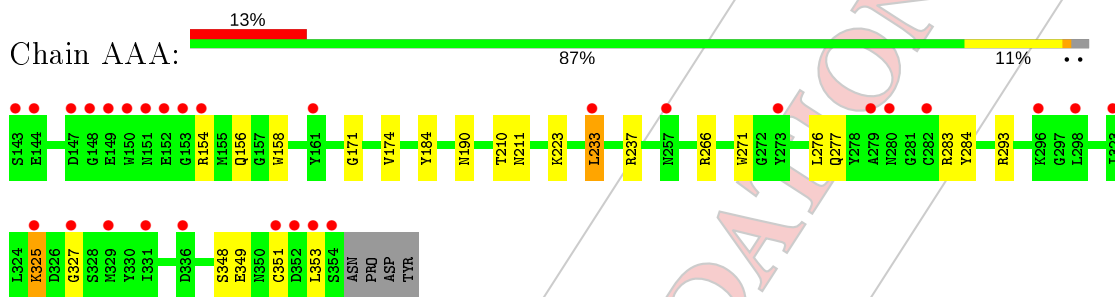

- Molecule 1: MORN repeat-containing protein 1

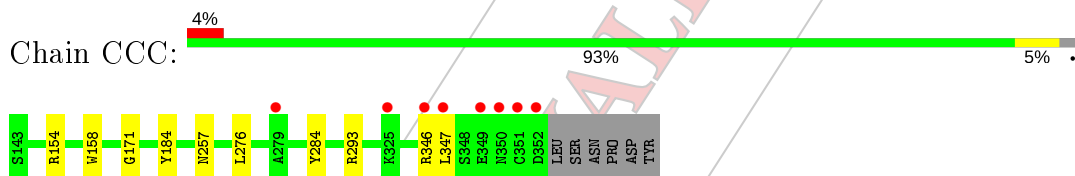

## 4 Data and refinement statistics i

| Property                                                                | Value                                                       | Source           |
|-------------------------------------------------------------------------|-------------------------------------------------------------|------------------|
| Space group                                                             | P 1 21 1                                                    | Depositor        |
| Cell constants<br>a, b, c, $\alpha$ , $\beta$ , $\gamma$                | 69.04Å 27.63Å 114.54Å<br>90.00° 101.83° 90.00°              | Depositor        |
| Resolution (Å)                                                          | 48.28 – 2.35<br>48.28 – 2.35                                | Depositor<br>EDS |
| % Data completeness<br>(in resolution range)                            | 95.2 (48.28-2.35)<br>95.3 (48.28-2.35)                      | Depositor<br>EDS |
| $R_{merge}$                                                             | 0.09                                                        | Depositor        |
| $R_{sym}$                                                               | (Not available)                                             | Depositor        |
| $\langle I/\sigma(I) \rangle$ <sup>1</sup>                              | 3.10 (at 2.34Å)                                             | Xtrriage         |
| Refinement program                                                      | REFMAC 5.8.0257                                             | Depositor        |
| R, $R_{free}$                                                           | 0.221 , 0.259<br>0.225 , 0.265                              | Depositor<br>DCC |
| $R_{free}$ test set                                                     | 818 reflections (4.69%)                                     | wwPDB-VP         |
| Wilson B-factor (Å <sup>2</sup> )                                       | 31.4                                                        | Xtrriage         |
| Anisotropy                                                              | 0.463                                                       | Xtrriage         |
| Bulk solvent $k_{sol}$ (e/Å <sup>3</sup> ), $B_{sol}$ (Å <sup>2</sup> ) | 0.42 , 45.7                                                 | EDS              |
| L-test for twinning <sup>2</sup>                                        | $\langle  L  \rangle = 0.50$ , $\langle L^2 \rangle = 0.33$ | Xtrriage         |
| Estimated twinning fraction                                             | No twinning to report.                                      | Xtrriage         |
| $F_o, F_c$ correlation                                                  | 0.94                                                        | EDS              |
| Total number of atoms                                                   | 6556                                                        | wwPDB-VP         |
| Average B, all atoms (Å <sup>2</sup> )                                  | 38.0                                                        | wwPDB-VP         |

Xtrriage's analysis on translational NCS is as follows: *The largest off-origin peak in the Patterson function is 14.59% of the height of the origin peak. No significant pseudotranslation is detected.*

<sup>1</sup> Intensities estimated from amplitudes.

<sup>2</sup> Theoretical values of  $\langle |L| \rangle$ ,  $\langle L^2 \rangle$  for acentric reflections are 0.5, 0.333 respectively for untwinned datasets, and 0.375, 0.2 for perfectly twinned datasets.

## 5 Model quality (i)

### 5.1 Standard geometry (i)

The Z score for a bond length (or angle) is the number of standard deviations the observed value is removed from the expected value. A bond length (or angle) with  $|Z| > 5$  is considered an outlier worth inspection. RMSZ is the root-mean-square of all Z scores of the bond lengths (or angles).

| Mol | Chain | Bond lengths |         | Bond angles |         |
|-----|-------|--------------|---------|-------------|---------|
|     |       | RMSZ         | # Z  >5 | RMSZ        | # Z  >5 |
| 1   | AAA   | 0.62         | 0/1763  | 0.76        | 0/2375  |
| 1   | CCC   | 0.61         | 0/1749  | 0.75        | 0/2356  |
| All | All   | 0.62         | 0/3512  | 0.75        | 0/4731  |

There are no bond length outliers.

There are no bond angle outliers.

There are no chirality outliers.

There are no planarity outliers.

### 5.2 Too-close contacts (i)

In the following table, the Non-H and H(model) columns list the number of non-hydrogen atoms and hydrogen atoms in the chain respectively. The H(added) column lists the number of hydrogen atoms added and optimized by MolProbity. The Clashes column lists the number of clashes within the asymmetric unit, whereas Symm-Clashes lists symmetry related clashes.

| Mol | Chain | Non-H | H(model) | H(added) | Clashes | Symm-Clashes |
|-----|-------|-------|----------|----------|---------|--------------|
| 1   | AAA   | 1709  | 1547     | 1536     | 14      | 0            |
| 1   | CCC   | 1695  | 1531     | 1520     | 2       | 0            |
| 2   | AAA   | 25    | 0        | 0        | 0       | 0            |
| 2   | CCC   | 49    | 0        | 0        | 0       | 0            |
| All | All   | 3478  | 3078     | 3056     | 16      | 0            |

The all-atom clashscore is defined as the number of clashes found per 1000 atoms (including hydrogen atoms). The all-atom clashscore for this structure is 2.

All (16) close contacts within the same asymmetric unit are listed below, sorted by their clash magnitude.

| Atom-1          | Atom-2            | Interatomic distance (Å) | Clash overlap (Å) |
|-----------------|-------------------|--------------------------|-------------------|
| 1:AAA:211:ASN:O | 1:AAA:233:LEU:CD1 | 2.51                     | 0.58              |

*Continued on next page...*

Continued from previous page...

| Atom-1             | Atom-2             | Interatomic distance (Å) | Clash overlap (Å) |
|--------------------|--------------------|--------------------------|-------------------|
| 1:AAA:233:LEU:N    | 1:AAA:233:LEU:HD22 | 2.20                     | 0.56              |
| 1:CCC:284:TYR:CD1  | 1:CCC:293:ARG:HD2  | 2.44                     | 0.53              |
| 1:AAA:284:TYR:CD1  | 1:AAA:293:ARG:HD2  | 2.44                     | 0.52              |
| 1:AAA:351:CYS:SG   | 1:AAA:351:CYS:O    | 2.69                     | 0.50              |
| 1:AAA:233:LEU:H    | 1:AAA:233:LEU:HD22 | 1.78                     | 0.49              |
| 1:AAA:277:GLN:HE22 | 1:AAA:283:ARG:HD3  | 1.79                     | 0.47              |
| 1:AAA:327:GLY:C    | 1:AAA:348:SER:HB2  | 2.36                     | 0.46              |
| 1:AAA:190:ASN:ND2  | 1:AAA:210:THR:H    | 2.12                     | 0.46              |
| 1:AAA:353:LEU:HD12 | 1:AAA:353:LEU:C    | 2.36                     | 0.46              |
| 1:AAA:349:GLU:HA   | 1:AAA:353:LEU:HD11 | 2.00                     | 0.43              |
| 1:AAA:325:LYS:C    | 1:AAA:327:GLY:N    | 2.73                     | 0.41              |
| 1:CCC:158:TRP:CH2  | 1:CCC:171:GLY:HA2  | 2.55                     | 0.41              |
| 1:AAA:156:GLN:HG3  | 1:AAA:174:VAL:HA   | 2.03                     | 0.41              |
| 1:AAA:158:TRP:CH2  | 1:AAA:171:GLY:HA2  | 2.56                     | 0.41              |
| 1:AAA:211:ASN:O    | 1:AAA:233:LEU:HD12 | 2.18                     | 0.41              |

There are no symmetry-related clashes.

## 5.3 Torsion angles [\(i\)](#)

### 5.3.1 Protein backbone [\(i\)](#)

In the following table, the Percentiles column shows the percent Ramachandran outliers of the chain as a percentile score with respect to all X-ray entries followed by that with respect to entries of similar resolution.

The Analysed column shows the number of residues for which the backbone conformation was analysed, and the total number of residues.

| Mol | Chain | Analysed      | Favoured  | Allowed | Outliers | Percentiles |     |
|-----|-------|---------------|-----------|---------|----------|-------------|-----|
| 1   | AAA   | 210/216 (97%) | 199 (95%) | 10 (5%) | 1 (0%)   | 31          | 34  |
| 1   | CCC   | 208/216 (96%) | 201 (97%) | 7 (3%)  | 0        | 100         | 100 |
| All | All   | 418/432 (97%) | 400 (96%) | 17 (4%) | 1 (0%)   | 49          | 59  |

All (1) Ramachandran outliers are listed below:

| Mol | Chain | Res | Type |
|-----|-------|-----|------|
| 1   | AAA   | 325 | LYS  |

### 5.3.2 Protein sidechains [i](#)

In the following table, the Percentiles column shows the percent sidechain outliers of the chain as a percentile score with respect to all X-ray entries followed by that with respect to entries of similar resolution.

The Analysed column shows the number of residues for which the sidechain conformation was analysed, and the total number of residues.

| Mol | Chain | Analysed      | Rotameric | Outliers | Percentiles |    |
|-----|-------|---------------|-----------|----------|-------------|----|
| 1   | AAA   | 165/169 (98%) | 157 (95%) | 8 (5%)   | 28          | 33 |
| 1   | CCC   | 163/169 (96%) | 157 (96%) | 6 (4%)   | 37          | 45 |
| All | All   | 328/338 (97%) | 314 (96%) | 14 (4%)  | 32          | 38 |

All (14) residues with a non-rotameric sidechain are listed below:

| Mol | Chain | Res | Type |
|-----|-------|-----|------|
| 1   | AAA   | 154 | ARG  |
| 1   | AAA   | 184 | TYR  |
| 1   | AAA   | 223 | LYS  |
| 1   | AAA   | 233 | LEU  |
| 1   | AAA   | 237 | ARG  |
| 1   | AAA   | 266 | ARG  |
| 1   | AAA   | 271 | TRP  |
| 1   | AAA   | 276 | LEU  |
| 1   | CCC   | 154 | ARG  |
| 1   | CCC   | 184 | TYR  |
| 1   | CCC   | 257 | ASN  |
| 1   | CCC   | 276 | LEU  |
| 1   | CCC   | 346 | ARG  |
| 1   | CCC   | 347 | LEU  |

Some sidechains can be flipped to improve hydrogen bonding and reduce clashes. There are no such sidechains identified.

### 5.3.3 RNA [i](#)

There are no RNA molecules in this entry.

## 5.4 Non-standard residues in protein, DNA, RNA chains [i](#)

There are no non-standard protein/DNA/RNA residues in this entry.



## 5.5 Carbohydrates [i](#)

There are no carbohydrates in this entry.

## 5.6 Ligand geometry [i](#)

There are no ligands in this entry.

## 5.7 Other polymers [i](#)

There are no such residues in this entry.

## 5.8 Polymer linkage issues [i](#)

There are no chain breaks in this entry.

CONFIDENTIAL VALIDATION REPORT

## 6 Fit of model and data i

### 6.1 Protein, DNA and RNA chains i

In the following table, the column labelled '#RSRZ > 2' contains the number (and percentage) of RSRZ outliers, followed by percent RSRZ outliers for the chain as percentile scores relative to all X-ray entries and entries of similar resolution. The OWAB column contains the minimum, median, 95<sup>th</sup> percentile and maximum values of the occupancy-weighted average B-factor per residue. The column labelled 'Q < 0.9' lists the number of (and percentage) of residues with an average occupancy less than 0.9.

| Mol | Chain | Analysed      | <RSRZ> | #RSRZ > 2                                                                                                                             | OWAB(Å <sup>2</sup> ) | Q < 0.9 |
|-----|-------|---------------|--------|---------------------------------------------------------------------------------------------------------------------------------------|-----------------------|---------|
| 1   | AAA   | 212/216 (98%) | 0.98   | 29 (13%) <span style="border: 1px solid red; padding: 0 2px;">3</span> <span style="border: 1px solid red; padding: 0 2px;">4</span>  | 19, 40, 83, 99        | 0       |
| 1   | CCC   | 210/216 (97%) | 0.61   | 8 (3%) <span style="border: 1px solid red; padding: 0 2px;">40</span> <span style="border: 1px solid red; padding: 0 2px;">54</span>  | 15, 28, 65, 103       | 0       |
| All | All   | 422/432 (97%) | 0.80   | 37 (8%) <span style="border: 1px solid red; padding: 0 2px;">10</span> <span style="border: 1px solid red; padding: 0 2px;">15</span> | 15, 34, 75, 103       | 0       |

All (37) RSRZ outliers are listed below:

| Mol | Chain | Res | Type | RSRZ |
|-----|-------|-----|------|------|
| 1   | AAA   | 153 | GLY  | 8.3  |
| 1   | AAA   | 150 | TRP  | 4.1  |
| 1   | AAA   | 148 | GLY  | 4.1  |
| 1   | CCC   | 351 | CYS  | 4.0  |
| 1   | CCC   | 347 | LEU  | 3.9  |
| 1   | AAA   | 149 | GLU  | 3.8  |
| 1   | AAA   | 352 | ASP  | 3.7  |
| 1   | AAA   | 353 | LEU  | 3.6  |
| 1   | CCC   | 346 | ARG  | 3.4  |
| 1   | AAA   | 152 | GLU  | 3.4  |
| 1   | AAA   | 143 | SER  | 3.4  |
| 1   | AAA   | 257 | ASN  | 3.4  |
| 1   | AAA   | 144 | GLU  | 3.3  |
| 1   | AAA   | 329 | MET  | 3.2  |
| 1   | AAA   | 325 | LYS  | 3.0  |
| 1   | AAA   | 151 | ASN  | 2.9  |
| 1   | CCC   | 352 | ASP  | 2.8  |
| 1   | AAA   | 298 | LEU  | 2.8  |
| 1   | AAA   | 147 | ASP  | 2.7  |
| 1   | AAA   | 233 | LEU  | 2.6  |
| 1   | AAA   | 280 | ASN  | 2.6  |
| 1   | AAA   | 273 | TYR  | 2.5  |
| 1   | AAA   | 351 | CYS  | 2.5  |
| 1   | AAA   | 336 | ASP  | 2.5  |

*Continued on next page...*

*Continued from previous page...*

| Mol | Chain | Res | Type | RSRZ |
|-----|-------|-----|------|------|
| 1   | AAA   | 327 | GLY  | 2.4  |
| 1   | AAA   | 282 | CYS  | 2.4  |
| 1   | AAA   | 296 | LYS  | 2.4  |
| 1   | AAA   | 279 | ALA  | 2.3  |
| 1   | AAA   | 154 | ARG  | 2.3  |
| 1   | AAA   | 354 | SER  | 2.3  |
| 1   | CCC   | 279 | ALA  | 2.2  |
| 1   | AAA   | 161 | TYR  | 2.2  |
| 1   | AAA   | 331 | ILE  | 2.2  |
| 1   | CCC   | 325 | LYS  | 2.1  |
| 1   | CCC   | 349 | GLU  | 2.0  |
| 1   | AAA   | 323 | ILE  | 2.0  |
| 1   | CCC   | 350 | ASN  | 2.0  |

## 6.2 Non-standard residues in protein, DNA, RNA chains [i](#)

There are no non-standard protein/DNA/RNA residues in this entry.

## 6.3 Carbohydrates [i](#)

There are no carbohydrates in this entry.

## 6.4 Ligands [i](#)

There are no ligands in this entry.

## 6.5 Other polymers [i](#)

There are no such residues in this entry.
